# Supplementary material for: Weaker Nordic Seas convection and bottom water warming during Greenland stadials
Source: Research Square preprint supplement (doi:10.21203/rs.3.rs-6687057/v1), 2025-05-20
Supplement: Supplementary file 1 [file 610ed9705e7c6c9adc40578d.xlsx]

## Sheet: Table S5. Age model tie points
Supplementary Table S5. Age model tie points for 71GC/70PC (see Supplementary Fig. S1)
Age model tie point	Core depth (cm)	NGRIP age (GICC05 chronology years b2k) Rasmussen et al. (2014)	Duration (years)
Vedde Ash	7	12171	-		GIS = Greenland Interstadial, GS = Greenland Stadial
GS1 (YD1) onset	20	12896	1193		1Younger Dryas
GIS1 onset	54	14692	1796		2Heinrich stadials 1-6
GS1 (H12) onset	93	17480	2788		3Last Glacial Maximum
GIS2 (LGM3) onset	327	23340	5860		4Faroe-Shetland Interstadial 3b and Faroe-Shetland Interstadial 5b (Rasmussen and Thomsen, 2008)
GS3 (H22) onset	353	25500	2160
FS-IS3b4 onset	396	27540	2040
GIS3 onset	406	27780	240
GS4 onset	414	28600	820
GIS4 onset	433	28900	300
GS5 (H32) onset	459	30600	1700
FS-IS5b4 onset	509	32040	1440
GIS5 onset	521	32500	460
GS6 onset	527	33360	860
GIS6 onset	534	33740	380
GS7 onset	549	34740	1000
GIS7 onset	569	35480	740
GS8 onset	574	36580	1100
GIS8 onset	617	38220	1640
GS9 (H42) onset	639	39900	1700
GIS9 onset	647	40160	260
GS10 onset	662	40800	640
GIS10 onset	696	41460	660
GS11 onset	703	42240	780
GIS11 onset	726	43340	1100
GS12 onset	737	44280	940
GIS12 onset	793	46860	2580
GS13 (H52) onset	802	48340	1480
GIS13 onset	818	49280	940
GS14 onset	826	49600	320
GIS14 onset	868	54220	4620
GS15 onset	877	55400	1180
GIS15 onset	885	55800	400
GS16 onset	897	56500	700
GIS16 onset	920	58040	1540
GS17.1 onset	926	58560	520
GIS17.1 onset	947	59080	520
GS17.2 onset	953	59300	220
GIS17.2 onset	970	59440	140
GS18 (H62) onset	983	63840	4400
GIS18 onset	996	64100	260

## Sheet: Table S6. AMS dates
Supplementary Table S6. Calibrated AMS-14C radiocarbon dates (see Supplementary Fig. S1)
Core name	Sample depth (cm)	14C age and error	Mean age ± 1-s (calibrated years before present)2	Dated material
HH13-071GC	56 - 57	13,623 ± 52	15,590 ± 128	N. pachyderma3		1Depth after sediment record splicing
HH13-071GC	86 - 87	15,944 ± 54	17,236 ± 127	N. pachyderma3		2CALIB 8.2 program with Marine20 calibration curve, no ΔR applied
HH13-071GC	201 - 202	18,639 ± 864	21,658 ± 353	Bivalve		3Neogloboquadrina pachyderma
HH13-071GC	261 - 262	18,255 ± 84	21,126 ± 166	N. pachyderma3		4Benthic sample is believed to be re-worked or effected by an increased marine reservoir effect as the 14C age is older than the sample below it
HH13-071GC	311 - 312	20,517 ± 98	23,712 ± 151	N. pachyderma3
HH13-070PC	332 - 3331	23,349 ± 94	25,740 ± 114	N. pachyderma3
HH13-070PC	412 - 4131	24,762 ± 137	28,047 ± 202	N. pachyderma3
HH13-070PC	517 - 5181	28,878 ± 200	32,222 ± 352	N. pachyderma3
HH13-070PC	572 - 5731	31,813 ± 265	35,455 ± 299	N. pachyderma3
HH13-070PC	632 - 6331	34,405 ± 356	38,599 ± 483	N. pachyderma3

## Sheet: Table S7. SS data
Supplementary Table S7. Sortable silt (SS) data for 71GC/70PC
Core depth (cm)	Age (ka b2k)	SS geometric mean (µm)	SS%
6.5	12.171	26.0387	59.7124
11.5	12.4498	27.7196	66.732
16.5	12.7287	18.6351	32.4506
21.5	13.0016	23.705	55.2847
26.5	13.2658	19.265	45.7464
31.5	13.5299	16.8447	28.3011
36.5	13.794	17.176	38.1206
41.5	14.0581	18.0747	32.8419
46.5	14.3222	17.517	30.5088
51.5	14.5864	18.1006	28.1496
56.5	14.9065	18.967	26.6912
61.5	15.2639	19.782	36.1639
63.5	15.4069	19.6783	28.0159
68.5	15.7643	19.926	31.2648
73.5	16.1217	22.6739	38.8081
78.5	16.4792	19.3758	26.3733
83.5	16.8366	17.8414	19.6033
88.5	17.1941	19.8419	32.3868
93.5	17.505	19.6373	22.4654
98.5	17.6303	17.4501	27.0746
103.5	17.7555	17.6148	21.9088
108.5	17.8807	18.8512	29.489
113.5	18.0059	19.138	27.4524
118.5	18.1311	18.9258	23.8545
123.5	18.2563	19.8057	24.6882
127.5	18.3565	19.7803	30.1939
128.5	18.3815	20.3936	26.899
133.5	18.5068	18.6333	25.0369
138.5	18.632	19.5511	28.6494
143.5	18.7572	19.1225	26.7666
148.5	18.8824	18.7241	26.8381
153.5	19.0076	18.5362	24.7728
158.5	19.1328	18.4933	28.6821
163.5	19.258	17.9105	20.4465
168.5	19.3832	17.9118	27.2921
173.5	19.5085	16.6886	21.8207
178.5	19.6337	17.9795	28.2462
183.5	19.7589	17.6546	20.53
188.5	19.8841	17.9594	23.9953
193.5	20.0093	19.0103	21.2236
198.5	20.1345	21.1146	28.5351
203.5	20.2597	22.3548	32.6258
208.5	20.385	21.1432	27.3816
213.5	20.5102	19.6435	27.3501
218.5	20.6354	19.3748	34.7613
223.5	20.7606	18.4439	27.8745
228.5	20.8858	20.7946	31.4852
233.5	21.011	19.0733	31.2476
238.5	21.1362	18.0713	23.3062
243.5	21.2615	18.7	27.9244
248.5	21.3867	19.3105	20.2673
253.5	21.5119	19.5979	28.7461
258.5	21.6371	18.0031	23.8363
263.5	21.7623	19.233	31.3252
268.5	21.8875	17.491	26.8263
273.5	22.0127	18.5193	30.5329
278.5	22.1379	19.9331	26.2963
283.5	22.2632	22.6848	34.7516
288.5	22.3884	18.8297	26.8313
293.5	22.5136	19.3504	35.8476
298.5	22.6388	19.4516	30.6483
303.5	22.764	17.541	28.5285
308.5	22.8892	20.928	27.0107
313.5	23.0144	21.4451	41.4359
318.5	23.1397	18.0333	25.2986
323.5	23.2649	18.7706	28.6892
328.5	23.5062	19.5163	23.4915
329.5	23.5892	20.1909	21.8495
334.5	24.0046	19.4346	20.8418
339.5	24.42	19.3099	25.9944
344.5	24.8354	19.5165	22.0399
349.5	25.2508	19.881	21.1546
354.5	25.5949	19.6274	22.3181
359.5	25.8321	19.7079	19.4498
364.5	26.0693	19.1518	17.3826
369.5	26.3065	19.8253	21.2809
374.5	26.5437	20.553	22.7183
379.5	26.7809	20.0635	25.2296
384.5	27.0181	19.0376	27.2049
389.5	27.2553	19.524	26.1494
394.5	27.4926	19.4943	20.6112
399.5	27.636	17.89	30.2359
404.5	27.756	18.8334	24.4709
409.5	28.19	19.0827	21.8235
414.5	28.6158	19.5624	34.4392
419.5	28.6947	16.148	22.36
424.5	28.7737	17.1824	23.5607
429.5	28.8526	18.1155	24.0832
434.5	29.0308	18.7577	17.3008
439.5	29.3577	18.8606	21.6999
444.5	29.6846	19.0284	18.5196
449.5	30.0115	18.7103	17.6012
454.5	30.3385	19.0627	21.526
459.5	30.6288	19.2212	28.3737
464.5	30.7728	17.5519	23.3201
469.5	30.9168	18.7128	23.4988
474.5	31.0608	19.3731	28.4463
476.5	31.1184	19.0444	20.7954
479.5	31.2048	19.6395	26.1719
482.5	31.2912	19.4926	25.1645
484.5	31.3488	20.132	21.1494
487.5	31.4352	19.3253	19.7081
489.5	31.4928	19.8215	18.8395
492.5	31.5792	19.0485	23.5616
494.5	31.6368	19.1614	22.7477
497.5	31.7232	19.0539	17.6152
499.5	31.7808	18.4387	17.9284
502.5	31.8672	17.6655	20.5217
504.5	31.9248	18.7526	26.3449
507.5	32.0112	17.4488	22.4728
509.5	32.0783	17.065	28.8183
512.5	32.1933	17.3575	25.6798
514.5	32.27	16.6573	24.5302
517.5	32.385	17.2739	24.3056
519.5	32.4617	18.3098	26.9899
522.5	32.7867	19.3843	24.6853
524.5	33.0733	19.1755	29.1682
527.5	33.4143	20.598	40.8147
529.5	33.5229	22.3076	47.6614
532.5	33.6857	17.9266	35.0702
534.5	33.8067	18.4077	34.5051
537.5	34.0067	17.73	28.7264
539.5	34.14	19.035	28.9808
542.5	34.34	19.1026	30.6795
544.5	34.4733	19.6315	31.9688
547.5	34.6733	18.4863	29.8675
549.5	34.777	19.1813	38.2137
552.5	34.888	18.8192	40.8746
554.5	34.962	17.9992	37.49
557.5	35.073	19.2584	43.1684
559.5	35.147	20.6402	49.2422
562.5	35.258	19.0217	44.1323
564.5	35.332	20.3344	48.5052
567.5	35.443	17.8814	34.9133
569.5	35.7	18.8305	28.802
572.5	36.36	18.7912	30.175
574.5	36.6181	22.442	46.6286
579.5	36.8088	17.9228	34.4572
584.5	36.9995	18.7968	37.949
589.5	37.1902	21.1232	51.9772
594.5	37.3809	19.4795	47.7654
599.5	37.5716	20.2514	48.7386
604.5	37.7623	20.3842	45.9441
609.5	37.953	20.305	44.3784
612.5	38.0674	19.5439	39.9407
614.5	38.1437	20.4904	42.4002
617.5	38.2964	19.068	34.8303
619.5	38.4491	21.0109	40.682
622.5	38.6782	19.8635	35.491
624.5	38.8309	18.2923	28.971
627.5	39.06	22.0067	41.0347
629.5	39.2127	20.3516	36.9377
632.5	39.4418	21.0704	38.2219
634.5	39.5945	20.0434	34.0707
637.5	39.8236	18.601	23.776
639.5	39.9325	19.3896	31.2334
642.5	40.03	30.0182	60.3158
643.5	40.0625	27.433	54.8635
644.5	40.095	20.8883	40.4691
647.5	40.2027	17.1691	26.6168
649.5	40.288	19.3914	31.5948
654.5	40.5013	19.1305	29.987
659.5	40.7147	18.2497	23.6127
664.5	40.8582	18.5794	30.6467
669.5	40.9553	19.1245	39.853
674.5	41.0524	19.2361	43.0097
678.5	41.13	19.1247	42.2672
683.5	41.2271	19.1947	43.8581
688.5	41.3241	20.1823	45.744
693.5	41.4212	17.7916	32.5271
698.5	41.7943	19.1625	29.9484
703.5	42.2878	18.9456	31.2499
708.5	42.527	18.9443	38.7142
713.5	42.7661	18.2033	36.1324
718.5	43.0052	19.0673	44.8703
723.5	43.2443	17.265	35.5211
728.5	43.5964	18.0885	28.1863
733.5	44.0236	18.435	27.9794
738.5	44.3721	22.0614	51.1734
743.5	44.6025	17.292	32.0572
748.5	44.8329	19.3371	45.6828
753.5	45.0632	18.5425	39.1203
758.5	45.2936	17.7475	37.8741
763.5	45.5239	19.4437	46.7297
768.5	45.7543	20.4403	48.4742
773.5	45.9846	19.1032	41.8809
778.5	46.215	19.3889	45.1232
783.5	46.4454	19.2444	38.2959
788.5	46.6757	17.2345	26.6274
793.5	47.0244	19.9414	28.1072
798.5	47.8467	19.5331	28.8582
803.5	48.4575	22.7808	47.5707
808.5	48.7512	19.7571	41.027
813.5	49.045	19.3886	37.9693
818.5	49.32	18.3647	28.5976
823.5	49.52	20.1635	32.4703
828.5	49.93	22.0172	46.9221
833.5	50.48	19.0133	42.6125
838.5	51.03	20.8046	46.6247
843.5	51.58	18.7034	37.8485
848.5	52.13	21.1013	41.7576
853.5	52.68	26.0397	59.9199
858.5	53.23	22.3831	52.1248
863.5	53.78	21.0134	44.2372
868.5	54.3511	18.0116	30.4394
873.5	55.0067	18.3061	25.0719
878.5	55.5	26.0817	57.5871
883.5	55.75	20.9451	45.7711
888.5	56.08	18.6851	24.6618
893.5	56.43	18.1228	27.8414
898.5	56.7464	21.7864	48.3229
903.5	57.0544	20.7038	47.3441
908.5	57.3624	19.5869	42.0143
913.5	57.6704	18.9036	35.216
918.5	57.9784	21.0649	42.6933
923.5	58.3867	18.227	27.6346
928.5	58.6343	20.1626	40.9434
933.5	58.7581	20.3099	43.8404
938.5	58.8819	18.3533	31.2879
943.5	59.0057	19.1864	31.1785
948.5	59.1533	23.0661	41.0481
953.5	59.3082	21.9694	36.8111
958.5	59.3494	21.7673	36.7345
963.5	59.3906	22.3377	37.346
968.5	59.4318	22.3538	35.8718
973.5	60.7938	19.4633	19.9307
976.5	61.8092	19.2521	23.7315
979.5	62.8246	19.2782	24.9001
983.5	63.86	18.8705	28.7475
988.5	63.96	19.572	31.1792
993.5	64.06	20.0869	36.2069

## Sheet: Table S8. MgCa data
Supplementary Table S8. Mg/Ca data for 71GC/70PC
Core depth (cm)	Age (ka b2k)	Mg/Ca (mmol/mol)	BWT (°C)	Species
16.5	12.7287	1.806	6.4	M. barleeanus		1Overlap of species at the same sample depth
26.5	13.2658	0.69	-1.3	M. barleeanus
31.5	13.5299	0.759	-0.5	M. barleeanus
36.5	13.794	0.757	-0.5	M. barleeanus
41.5	14.0581	0.73	-0.8	M. barleeanus
46.5	14.3222	0.791	-0.2	M. barleeanus
46.5	14.32	0.866	0	C. neoteretis1
51.5	14.5864	0.85	0.4	M. barleeanus
56.5	14.9065	0.864	0.5	M. barleeanus
56.5	14.91	0.971	1.4	C. neoteretis1
63.5	15.2639	1.316	5.1	C. neoteretis
68.5	15.4069	1.14	3.4	C. neoteretis
73.5	15.7643	1.184	3.8	C. neoteretis
78.5	16.1217	1.094	2.9	C. neoteretis
83.5	16.4792	1.071	2.6	C. neoteretis
88.5	16.8366	0.991	1.7	C. neoteretis
93.5	17.1941	0.898	0.5	C. neoteretis
93.5	17.505	0.915	1	M. barleeanus1
98.5	17.6303	0.837	0.3	M. barleeanus
103.5	17.7555	0.857	-0.1	C. neoteretis
113.5	18.0059	0.823	-0.6	C. neoteretis
118.5	18.1311	0.839	-0.4	C. neoteretis
123.5	18.2563	0.865	0	C. neoteretis
127.5	18.3565	0.847	-0.2	C. neoteretis
133.5	18.5068	0.812	-0.8	C. neoteretis
138.5	18.632	0.827	-0.5	C. neoteretis
143.5	18.7572	0.937	1	C. neoteretis
148.5	18.8824	0.815	-0.7	C. neoteretis
153.5	19.0076	0.812	-0.8	C. neoteretis
158.5	19.1328	0.792	-1.1	C. neoteretis
163.5	19.258	0.813	-0.7	C. neoteretis
168.5	19.3832	0.792	-1.1	C. neoteretis
173.5	19.5085	0.804	-0.9	C. neoteretis
178.5	19.6337	0.8	-0.9	C. neoteretis
183.5	19.7589	0.757	-1.6	C. neoteretis
188.5	19.8841	0.779	-1.3	C. neoteretis
193.5	20.0093	0.814	-0.7	C. neoteretis
198.5	20.1345	0.841	-0.3	C. neoteretis
203.5	20.2597	0.839	-0.4	C. neoteretis
208.5	20.385	0.83	-0.5	C. neoteretis
213.5	20.5102	0.901	0.5	C. neoteretis
218.5	20.6354	0.903	0.5	C. neoteretis
223.5	20.7606	0.87	0.1	C. neoteretis
228.5	20.8858	0.88	0.2	C. neoteretis
233.5	21.011	0.813	-0.7	C. neoteretis
238.5	21.1362	0.778	-1.3	C. neoteretis
243.5	21.2615	0.891	0.4	C. neoteretis
248.5	21.3867	0.916	0.7	C. neoteretis
253.5	21.5119	0.873	0.1	C. neoteretis
258.5	21.6371	0.935	1	C. neoteretis
263.5	21.7623	0.904	0.5	C. neoteretis
268.5	21.8875	0.854	-0.1	C. neoteretis
273.5	22.0127	0.881	0.2	C. neoteretis
278.5	22.1379	0.881	0.2	C. neoteretis
283.5	22.2632	0.803	-0.9	C. neoteretis
288.5	22.3884	0.845	-0.3	C. neoteretis
293.5	22.5136	0.896	0.5	C. neoteretis
298.5	22.6388	0.818	-0.7	C. neoteretis
303.5	22.764	0.806	-0.9	C. neoteretis
308.5	22.8892	0.966	1.36	C. neoteretis
313.5	23.0144	0.857	-0.1	C. neoteretis
318.5	23.1397	0.919	0.8	C. neoteretis
323.5	23.2649	0.914	0.7	C. neoteretis
328.5	23.5062	1.12	3.2	C. neoteretis
329.5	23.5892	1.043	2.3	C. neoteretis
334.5	24.0046	1.019	2	C. neoteretis
339.5	24.42	0.887	0.3	C. neoteretis
344.5	24.8354	0.926	0.8	C. neoteretis
349.5	25.2508	0.861	0	C. neoteretis
354.5	25.5949	0.831	-0.5	C. neoteretis
359.5	25.8321	0.854	-0.2	C. neoteretis
364.5	26.0693	0.823	-0.6	C. neoteretis
369.5	26.3065	0.849	-0.2	C. neoteretis
374.5	26.5437	0.824	-0.6	C. neoteretis
379.5	26.7809	0.933	0.9	C. neoteretis
389.5	27.2553	0.874	0.1	C. neoteretis
394.5	27.4926	0.884	0.3	C. neoteretis
399.5	27.636	0.834	-0.4	C. neoteretis
404.5	27.756	0.907	0.6	C. neoteretis
409.5	28.19	0.997	1.8	C. neoteretis
419.5	28.6947	0.818	-0.7	C. neoteretis
424.5	28.7737	0.867	0	C. neoteretis
429.5	28.8526	0.82	-0.6	C. neoteretis
434.5	29.0308	0.947	1.1	C. neoteretis
439.5	29.3577	1.132	3.3	C. neoteretis
444.5	29.6846	1.151	3.5	C. neoteretis
454.5	30.3385	0.818	-0.7	C. neoteretis
464.5	30.7728	0.814	-0.7	C. neoteretis
469.5	30.9168	0.911	0.6	C. neoteretis
474.5	31.0608	0.793	-1.1	C. neoteretis
476.5	31.1184	0.897	0.5	C. neoteretis
479.5	31.2048	0.869	0.1	C. neoteretis
482.5	31.2912	0.835	-0.4	C. neoteretis
484.5	31.3488	0.783	-1.2	C. neoteretis
487.5	31.4352	0.816	-0.7	C. neoteretis
489.5	31.4928	0.787	-1.1	C. neoteretis
494.5	31.6368	0.823	-0.6	C. neoteretis
497.5	31.7232	0.889	0.4	C. neoteretis
499.5	31.7808	0.872	0.1	C. neoteretis
502.5	31.8672	0.776	-1.3	C. neoteretis
504.5	31.9248	0.713	-2.3	C. neoteretis
507.5	32.0112	0.853	-0.2	C. neoteretis
509.5	32.0783	0.892	0.4	C. neoteretis
512.5	32.1933	0.843	-0.3	C. neoteretis
514.5	32.27	0.921	0.8	C. neoteretis
517.5	32.385	0.899	0.5	C. neoteretis
519.5	32.4617	0.921	0.8	C. neoteretis
519.5	32.4617	0.829	0.2	M. barleeanus1
522.5	32.7867	0.889	0.3	C. neoteretis
524.5	33.0733	0.885	0.3	C. neoteretis
527.5	33.4143	0.97	1.4	M. barleeanus
529.5	33.5229	0.727	-0.9	M. barleeanus
532.5	33.6857	0.765	-0.5	M. barleeanus
534.5	33.8067	0.951	1.3	M. barleeanus
537.5	34.0067	0.862	0.5	M. barleeanus
539.5	34.14	0.801	-0.1	M. barleeanus
542.5	34.34	0.889	0.7	M. barleeanus
544.5	34.4733	0.823	0.1	M. barleeanus
547.5	34.6733	0.731	-0.8	M. barleeanus
549.5	34.777	0.74	-0.7	M. barleeanus
552.5	34.888	0.731	-0.8	M. barleeanus
554.5	34.962	0.822	0.1	M. barleeanus
559.5	35.147	0.892	0.8	M. barleeanus
567.5	35.443	0.767	-0.4	M. barleeanus
569.5	35.7	0.895	0.8	M. barleeanus
572.5	36.36	0.8	-0.1	M. barleeanus
574.5	36.6181	0.772	-0.4	M. barleeanus
579.5	36.8088	0.792	-0.2	M. barleeanus
584.5	36.9995	0.781	-0.3	M. barleeanus
589.5	37.1902	0.847	0.4	M. barleeanus
594.5	37.3809	0.908	0.9	M. barleeanus
599.5	37.5716	0.796	-0.1	M. barleeanus
604.5	37.7623	0.845	0.3	M. barleeanus
609.5	37.953	0.791	-0.2	M. barleeanus
612.5	38.0674	0.776	-0.3	M. barleeanus
614.5	38.1437	0.8	-0.1	M. barleeanus
617.5	38.2964	0.948	1.3	M. barleeanus
619.5	38.4491	0.973	1.5	M. barleeanus
619.5	38.4491	0.92	0.8	C. neoteretis1
622.5	38.6782	0.955	1.2	C. neoteretis
624.5	38.8309	0.991	1.7	C. neoteretis
627.5	39.06	1.174	3.7	C. neoteretis
629.5	39.2127	1.213	4.1	C. neoteretis
632.5	39.4418	1.007	1.9	C. neoteretis
634.5	39.5945	0.978	1.5	C. neoteretis
637.5	39.8236	0.945	1.1	C. neoteretis
639.5	39.9325	0.832	0.5	C. neoteretis
644.5	40.095	0.815	0	M. barleeanus
647.5	40.2	0.937	1.2	M. barleeanus
647.5	40.2027	0.942	1.1	C. neoteretis1
649.5	40.288	0.906	0.6	C. neoteretis
654.5	40.5013	0.914	0.7	C. neoteretis
659.5	40.7147	0.943	1.1	C. neoteretis

## Sheet: Table 9. Stable isotope data
Supplementary Table S9. Foraminiferal stable isotope data for 71GC/70PC
Core depth (cm)	Age (ka b2k)	Neogloboquadrina pachyderma δ18O (‰)	Cassidulina neoteretis δ18O (‰)	Melonis barleeanus δ18O (‰)	Cibicidoides wuellerstorfi δ18O (‰)	Cibicidoides floridanus δ18O (‰)	Oridorsalis umbonatus δ18O (‰)	Bulimina costata δ18O (‰)
6.5	12.171	2.75698		4.54862
11.5	12.4498	3.53949
16.5	12.7287	3.52167					4.51
21.5	13.0016	3.98609		5.24245
26.5	13.2658			5.15896
31.5	13.5299	3.81896		5.25056
36.5	13.794	3.91135		5.30112
41.5	14.0581	3.85901		5.26431
46.5	14.3222	3.69298		5.45721
51.5	14.5864	3.50308		5.059
56.5	14.9065	3.49559				3.37984
61.5	15.2639	2.98577	4.49943			3.13978
63.5	15.4069	2.81911				2.91507
68.5	15.7643	3.01462				2.8944
73.5	16.1217	2.53304				3.18096
78.5	16.4792	2.83197				3.01411
83.5	16.8366	3.23447	4.17192
88.5	17.1941	3.95527	4.91321
93.5	17.505	4.56523	5.36154
98.5	17.6303	4.52305	5.47946
103.5	17.7555	4.49981	5.40495
108.5	17.8807	4.58466	5.46079
113.5	18.0059	4.61588	5.52571
118.5	18.1311	4.66444	5.48617
123.5	18.2563	4.44448	5.63582
127.5	18.3565
128.5	18.3815	4.4816	5.57348
133.5	18.5068	4.64487	5.60959
138.5	18.632	4.58042	5.63734
143.5	18.7572	4.92194	5.47827
148.5	18.8824	4.66844	5.53117
153.5	19.0076	4.51651	5.49994
158.5	19.1328	4.61362	5.39614
163.5	19.258	4.80176	5.2852
168.5	19.3832	4.78629	5.4088
173.5	19.5085	4.60784	5.42643
178.5	19.6337	4.65885
183.5	19.7589	4.68182	5.34492
188.5	19.8841	4.59012	5.29096
193.5	20.0093	4.52738	5.32865
198.5	20.1345	4.85224	5.24138
203.5	20.2597	4.4837	5.3624
208.5	20.385	4.59766	5.3327
213.5	20.5102	4.59982	5.35134
218.5	20.6354	4.51624	5.23186
223.5	20.7606	4.43053	5.24402
228.5	20.8858	4.41001	5.32607
233.5	21.011	4.57205	5.26784
238.5	21.1362	4.64968	5.42531
243.5	21.2615	4.70041	5.17437
248.5	21.3867	4.71796	5.09684
253.5	21.5119	4.53156	5.1383
258.5	21.6371	4.77958	5.13924
263.5	21.7623	4.40972	5.09097
268.5	21.8875	4.61023	5.17258
273.5	22.0127	4.55732	5.14617
278.5	22.1379	4.58424	5.16158
283.5	22.2632	5.36935	5.08761
288.5	22.3884	4.66507	5.00761
293.5	22.5136	4.64601	5.20529
298.5	22.6388	4.96186	5.06074
303.5	22.764	4.54875	5.3
308.5	22.8892		4.51416
313.5	23.0144	4.42317
318.5	23.1397	4.51314	4.96727
323.5	23.2649	4.33391	4.91515
328.5	23.5062	3.96753	4.29405
329.5	23.5892	3.813
334.5	24.0046	3.88539
339.5	24.42	3.85871
344.5	24.8354	4.27803
349.5	25.2508	4.54708
354.5	25.5949	4.57684
359.5	25.8321	4.41976
364.5	26.0693	4.36216
369.5	26.3065	4.3912
374.5	26.5437	4.40181
379.5	26.7809	4.33939	5.30417
384.5	27.0181	4.41831	5.51436
389.5	27.2553	4.41607	5.37706
394.5	27.4926	4.39017	5.3366
399.5	27.636	4.29507	5.49585
404.5	27.756	4.222	5.1459
409.5	28.19	4.0586	4.72257
414.5	28.6158	4.14869	5.32763
419.5	28.6947	4.37887	5.5272
424.5	28.7737	4.39167	5.41301
429.5	28.8526	4.33918	5.39482		4.55118
434.5	29.0308	3.98391			4.27728
439.5	29.3577	3.59124					4.02
444.5	29.6846	3.07189					4.13
449.5	30.0115	2.93664
454.5	30.3385	3.85247	5.1507
459.5	30.6288	4.1531
464.5	30.7728	4.20292	5.36295
469.5	30.9168	4.30152	5.15824
474.5	31.0608	4.21002	5.05548
476.5	31.1184	4.72643	5.32674
479.5	31.2048	4.06777	5.08583
482.5	31.2912	4.30731	5.24681
484.5	31.3488	3.98312	5.04984
487.5	31.4352	4.44644	5.06832
489.5	31.4928	4.06702	4.98514
492.5	31.5792	4.40154	5.23331	5.47232
494.5	31.6368	4.31883	4.96617
497.5	31.7232	4.29316	4.97381
499.5	31.7808	4.54209	5.03715
502.5	31.8672	4.53823	5.09543
504.5	31.9248	4.18002	5.10531
507.5	32.0112	4.6462	5.20883	5.32119
509.5	32.0783	4.20542	5.25877
512.5	32.1933	4.45068		5.23597
514.5	32.27	4.22557	5.23849
517.5	32.385	4.39023		5.22372
519.5	32.4617	4.19156	5.13806
522.5	32.7867	4.22631	4.79929	4.79634
524.5	33.0733	3.8916	4.94879
527.5	33.4143	4.41621	5.3141	5.43578
529.5	33.5229	4.70729		5.20136
532.5	33.6857	4.56652		5.25752
534.5	33.8067	3.95433		5.38619
537.5	34.0067	4.36673		5.06978
539.5	34.14	3.95297		5.38695
542.5	34.34	4.26555		5.11523
544.5	34.4733	4.02022		5.24579
547.5	34.6733	4.36241		4.92942
549.5	34.777	4.22653		5.52123
552.5	34.888	4.453		5.11191
554.5	34.962	4.29003	5.35527	5.45852
557.5	35.073	4.33113	5.35137	5.69
559.5	35.147	3.96322		5.09705
562.5	35.258	4.34043		5.56123
564.5	35.332	4.21251		5.419
567.5	35.443	4.31727		5.35911
569.5	35.7	3.78682		5.00801
572.5	36.36	4.32807		4.68999
574.5	36.6181	4.23593		5.08328
579.5	36.8088	4.89019		4.97221
584.5	36.9995	4.85357		5.16258
589.5	37.1902	4.77827	5.14634	4.98588
594.5	37.3809	4.72881	5.19135	5.15286
599.5	37.5716	4.69417		5.17113
604.5	37.7623	4.77517		5.17061
609.5	37.953	4.79868		5.22532
612.5	38.0674	4.41472		5.16702
614.5	38.1437	4.54286		4.71491
617.5	38.2964	3.86615		4.8612
619.5	38.4491	4.29591	5.01584	5.06211
622.5	38.6782	4.19075		4.72462
624.5	38.8309	4.15286	4.49849
627.5	39.06	3.96521	4.31071
629.5	39.2127	3.44842	4.61305				4.35
632.5	39.4418	3.8343	5.02889
634.5	39.5945	4.26082	4.71876
637.5	39.8236	4.01144	4.9763
639.5	39.9325	4.59854	5.31282	5.54452
642.5	40.03	4.08853		5.18677
643.5	40.0625	4.25145		5.92845
644.5	40.095	4.81429		5.58805
647.5	40.2027			5.15629
649.5	40.288	4.86933	5.10818	5.45919
654.5	40.5013	4.70541	5.0799
659.5	40.7147	4.61115	5.02268	5.27558
664.5	40.8582	4.89284	5.39328	5.79328
669.5	40.9553	4.7452		5.35881
674.5	41.0524	4.33397		5.35795
678.5	41.13	4.97509		5.33333
683.5	41.2271	4.60379		4.94757
688.5	41.3241	4.51164		5.43583
693.5	41.4212	4.97358	5.38584	5.19428
698.5	41.7943	4.35791	4.95439
703.5	42.2878	4.72403		5.58729
708.5	42.527	5.04832	5.48617	5.57389
713.5	42.7661	4.81		5.70316
718.5	43.0052	4.86		5.64686
723.5	43.2443	4.75		5.58459
728.5	43.5964	4.64	5.27772	5.46869
733.5	44.0236	4.66	5.1379	5.5379
738.5	44.3721	4.68		5.10479
743.5	44.6025	4.69		5.70242
748.5	44.8329	4.78		5.67825
753.5	45.0632	4.81684	5.37177	5.48333
758.5	45.2936	4.63542		5.36358
763.5	45.5239	4.77831		5.52915
768.5	45.7543	4.65065		5.63586
773.5	45.9846	4.46929		5.63979
778.5	46.215	4.61992		5.60362
783.5	46.4454	4.60363		5.75369
788.5	46.6757	4.57572		5.84754
793.5	47.0244	4.33749	4.79171	5.38198
798.5	47.8467	4.63504	4.94536	5.2463
803.5	48.4575	4.29494		5.17309
808.5	48.7512	4.77094		5.27723
813.5	49.045	4.75175		5.28586
818.5	49.32	4.53251		5.17586
823.5	49.52	4.56603		5.10728
828.5	49.93	4.70058		5.34741
833.5	50.48	4.53483		5.35227
838.5	51.03	4.41931		5.424
843.5	51.58	4.52547		5.28833
848.5	52.13	4.38412		5.30413
853.5	52.68	4.17336		5.46844
858.5	53.23	4.05756		5.49844
863.5	53.78	4.48372		5.74512
868.5	54.3511	4.10719		5.76413
873.5	55.0067	4.18431		5.6163
878.5	55.5	4.09394		5.43476
883.5	55.75	4.14793		5.45506
888.5	56.08	4.33543		5.32224
893.5	56.43	4.6537		5.31466
898.5	56.7464	4.28102		5.35724
903.5	57.0544	4.57355		5.43872
908.5	57.3624	4.44406		5.40638
913.5	57.6704	4.79066		5.33403
918.5	57.9784	4.60704		5.32991
923.5	58.3867	4.43785		5.53644
928.5	58.6343	4.41628		5.35461
933.5	58.7581	4.2505	4.05345	5.38925
938.5	58.8819	4.38451		5.65219
943.5	59.0057	4.20839	5.17786	5.65879
948.5	59.1533
953.5	59.3082
958.5	59.3494
963.5	59.3906
968.5	59.4318
973.5	60.7938	3.75586	3.33477			3.72		3.74
976.5	61.8092	3.92384						4.12196
979.5	62.8246	4.3559	4.78193			3.44
983.5	63.86	4.62688	5.06166
988.5	63.96	4.72622		5.66751
993.5	64.06	4.62795		5.85347
